# Supplementary figures and images for: 加强基建工程执法监察抓工程,干部“双优”建设
Source: eLife journal article supplement (doi:10.7554/elife.71282), 1998-01-01

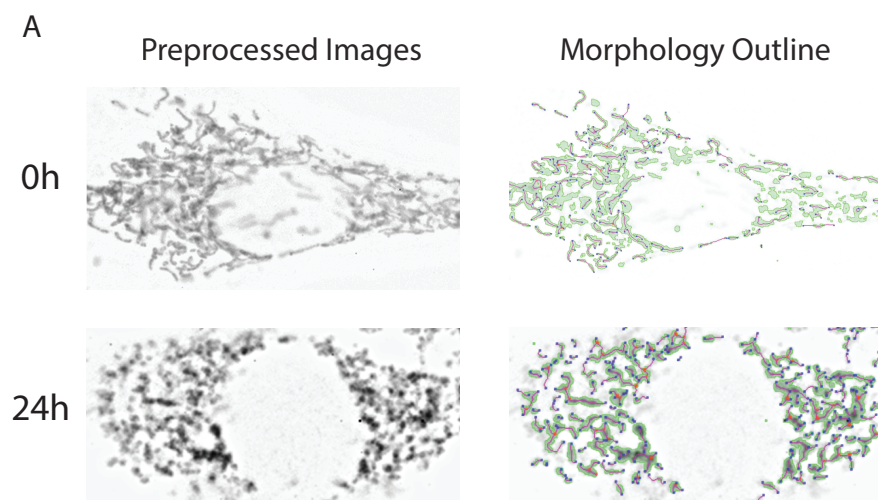

Figure 5-Supplement

Supplement: supp [file elife-71282-supp-v1.zip]

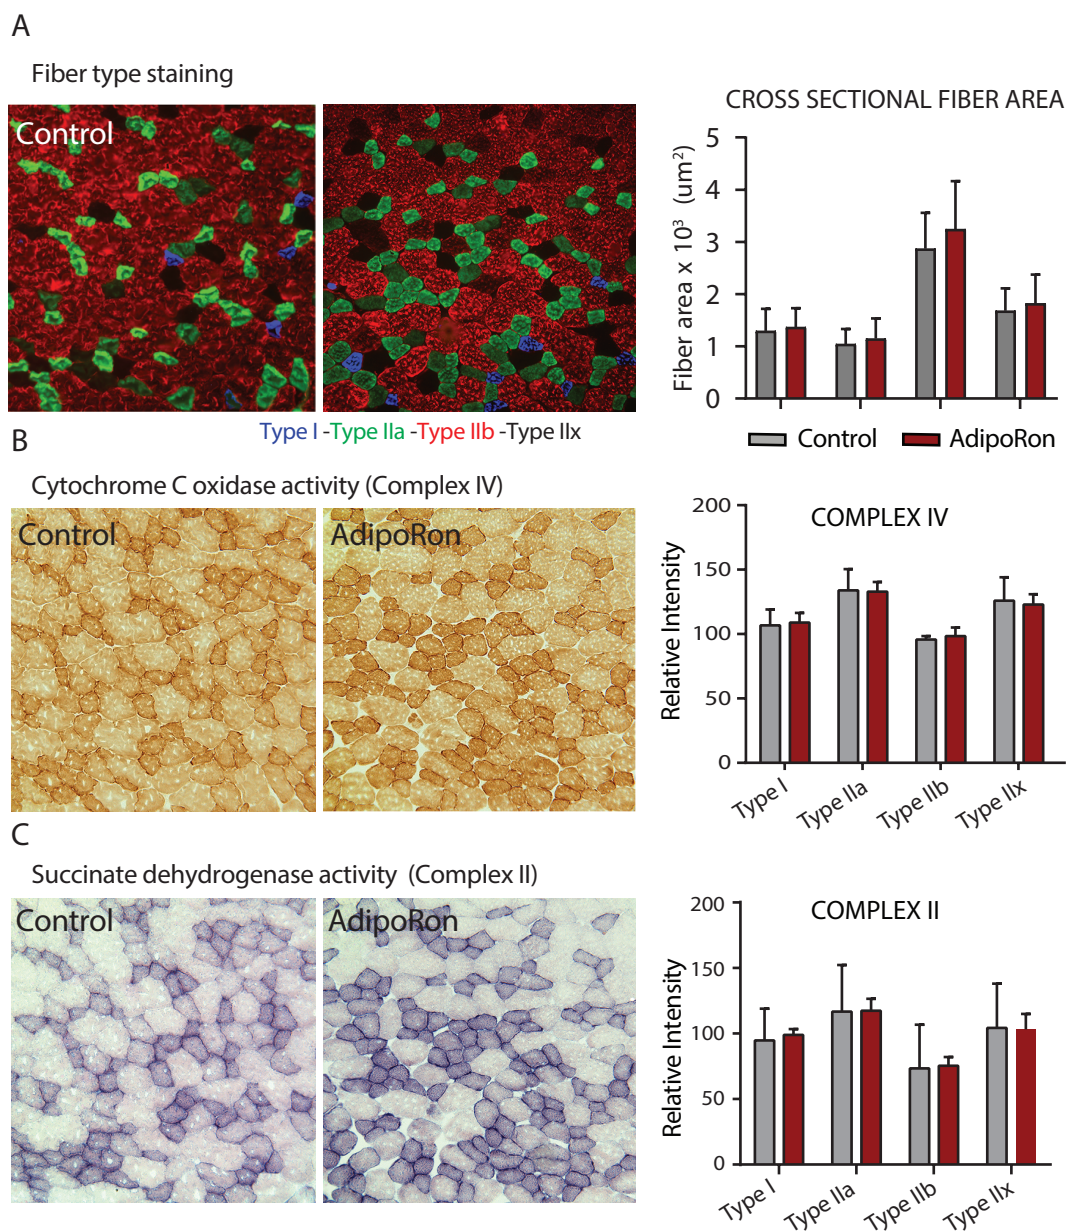

Figure 3-Supplement

Supplement: supp [file elife-71282-supp-v1.zip]

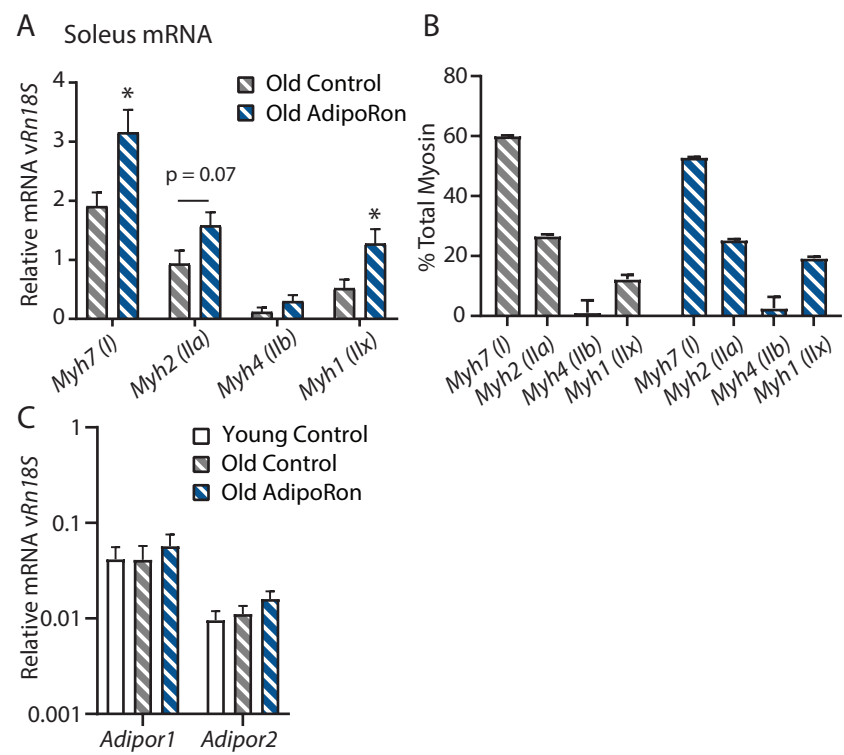

Figure 2-Supplement 1

Supplement: supp [file elife-71282-supp-v1.zip]

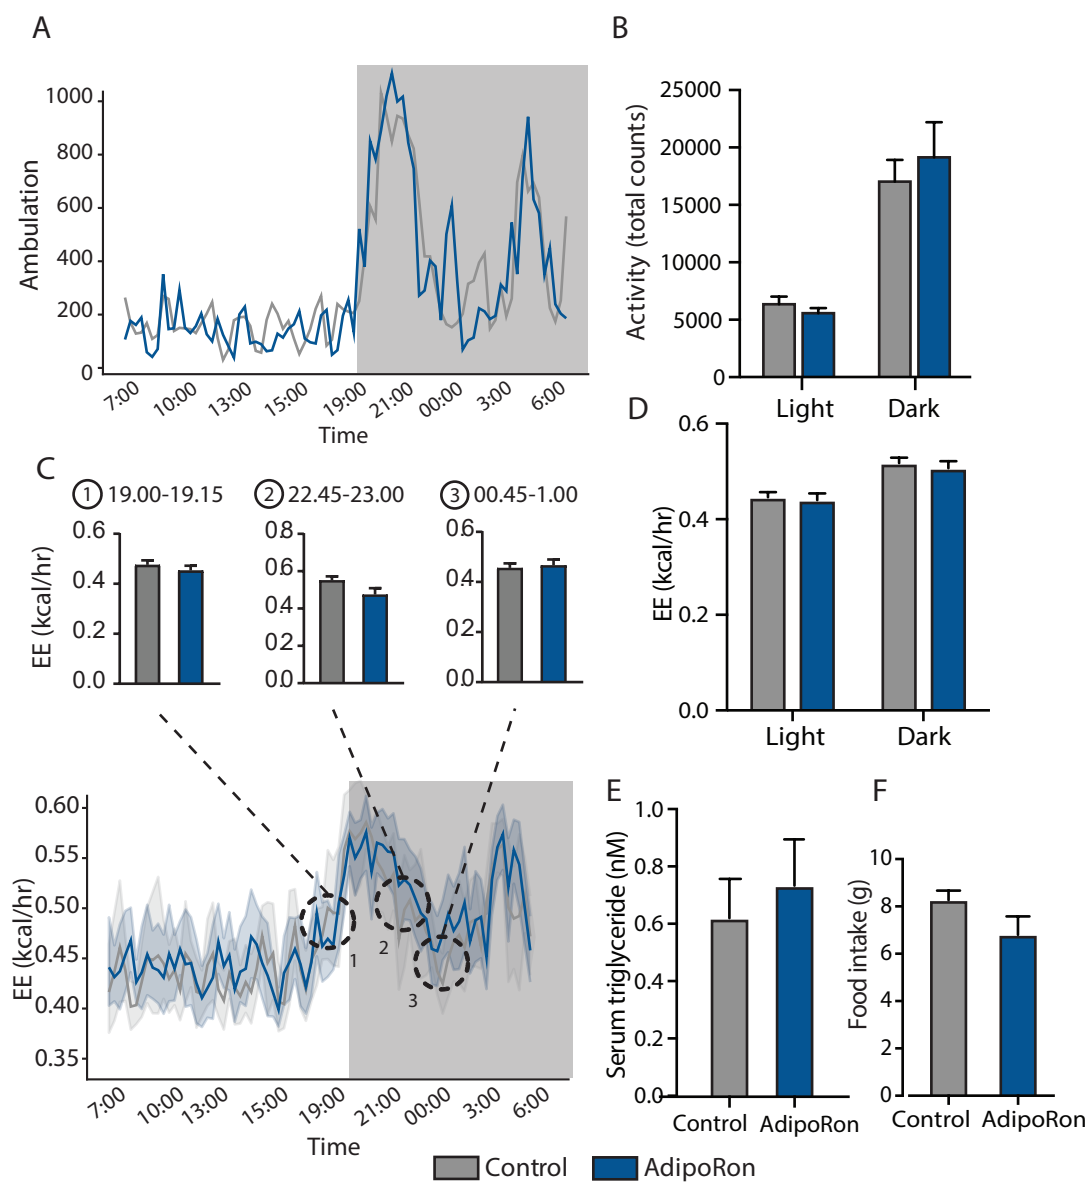

Figure 1-Supplement

Supplement: supp [file elife-71282-supp-v1.zip]

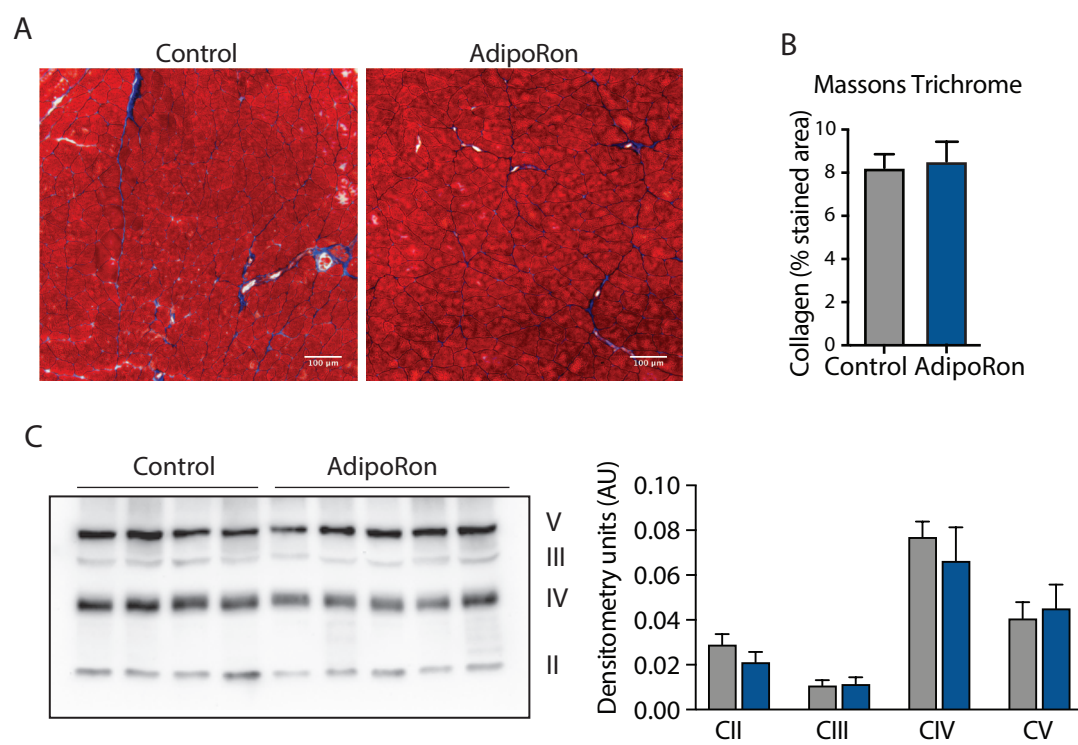

Figure 2-Supplement 2

Supplement: supp [file elife-71282-supp-v1.zip]
